# Supplementary material for: Conditional expression explains molecular evolution of social genes in a microbe
Source: PubMed Central journal article supplement (PMC6650454; doi:10.1038/s41467-019-11237-2), 2019-07-23
Supplement: 41467_2019_11237_MOESM1_ESM.pdf [file 41467_2019_11237_MOESM1_ESM.pdf]

## Supplementary Information

### Conditional expression explains molecular evolution of social genes in a microbe

Janaina Lima de Oliveira, Atahualpa Castillo Morales et al.

#### Contents:

1. **Supplementary Figure 1.** *D. discoideum* life cycle and identification of different groups of social genes.
2. **Supplementary Figure 2.** Identification and characterization of sociality genes.
3. **Supplementary Figure 3.** Sliding widow analysis of differential expression.
4. **Supplementary Figure 4.** Differential expression of *Tgr* genes through development.
5. **Supplementary Table 1.** GO enrichment analysis for sociality genes.
6. **Supplementary Table 2.** GO enrichment analysis for chimerism genes.
7. **Supplementary Table 3.** GO enrichment analysis for antagonism genes.
8. **Supplementary Table 4.** GO enrichment analysis for cheater genes.
9. **Supplementary Table 5.** Average number of SNPs (SNP/site) for social genes.
10. **Supplementary Table 6.** Comparison of observed and expected evolutionary parameters for sociality and antagonism genes based on the presence of each class in the other.
11. **Supplementary Table 7.** Comparison of observed and expected evolutionary parameters for antagonism genes with all sociality genes removed from the set.
12. **Supplementary Table 8.** Comparison of observed and expected evolutionary parameters for sociality genes with all antagonism genes removed from the set.
13. **Supplementary Table 9.** Comparison of evolutionary parameters at the subset of sociality genes relative to the background of all of the genes identified by Schilde et al.

14. **Supplementary Table 10.** Comparison of evolutionary parameters for sociality genes compared to the relevant background set of genes in a subset of genes that excludes those in the bottom quartile of expression.
15. **Supplementary Table 11.** Correlations between the index of social expression (ISE) and the set of evolutionary parameters that differ between sociality and the background set of genes.
16. **Supplementary Table 12.** Comparison of evolutionary parameters for conditional genes (observed) compared to those expected.
17. **Supplementary Table 13.** Complementary neutrality tests for social genes. Fu & Li's statistics compare external and internal branches of a genealogical tree.
18. **Supplementary Table 14.** Enrichment analysis of social genes evolving under balancing selection as defined by different cutoffs of Tajima's *D*.
19. **Supplementary Table 15.** Intraspecific variation in sociality genes excluding 13 genes evolving under balancing selection.
20. **Supplementary Table 16.** Enrichment analysis of social genes showing strong signatures of selection.
21. **Supplementary Table 17.** Comparison of evolutionary parameters at genes showing biased expression in either prestalk and prespore cells relative to the background of all of the genes expressed in the same cells.
22. **Supplementary Table 18.** Evolutionary statistics for prespore and prestalk genes.
23. **Supplementary Table 19.** Enrichment analysis of the number of prespore and prestalk genes carrying at least one mutation that introduces a stop codon or results in a partial deletion (presence/absence variation).
24. **Supplementary Table 20.** Genome sequencing statistics for the strains included in analyses.
25. **Supplementary References.**

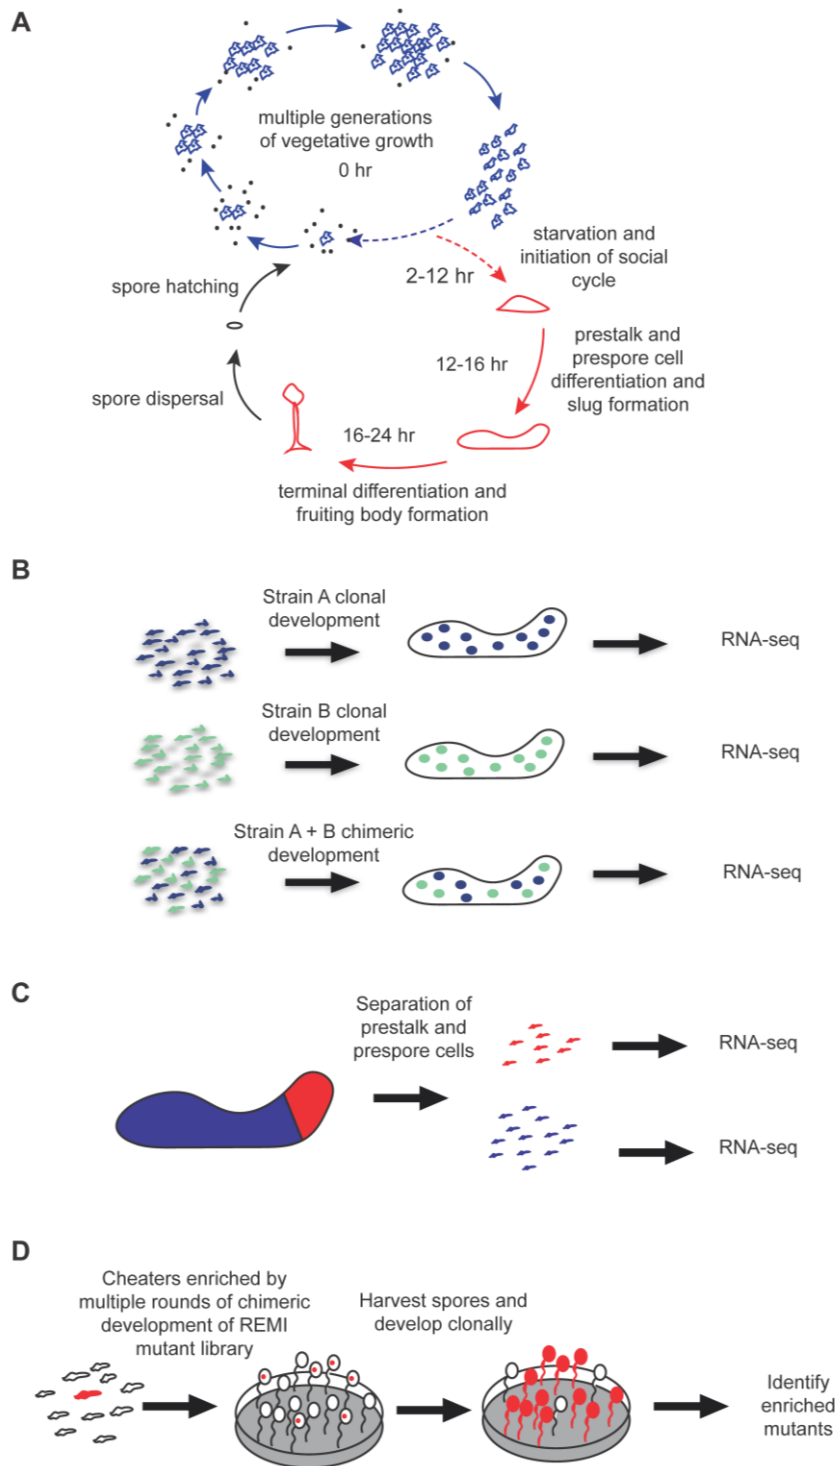

**Supplementary Figure 1.** *D. discoideum* life cycle and identification of different groups of social genes. **A)** Schematic figure showing the *D. discoideum* life cycle. Cells can go through many generations of vegetative life cycle (blue) whilst bacterial food is available. Multicellular social development (red) is a conditional strategy that is only entered if food supplies are depleted (dotted red arrow). The index of social expression was calculated by comparing transcript abundance at 0hr to all social stages (2-24 hr) using data from ref. 1. **B)** Chimerism genes were identified by comparing the transcriptome of strains that went through the social (developmental) stage clonally to those same strains mixed in chimeric development (where the green and blue cells are meant to represent different genotypes). **C)** Antagonism genes were identified comparing the transcriptome of isolated prestalk (red) and prespore (blue) cell populations<sup>2,3</sup>. **D)** Cheater genes were identified in a REMI screen designed to enrich for mutants (red, with all others appearing as white) that are overrepresented in the spore cell population after chimeric development<sup>4</sup>.

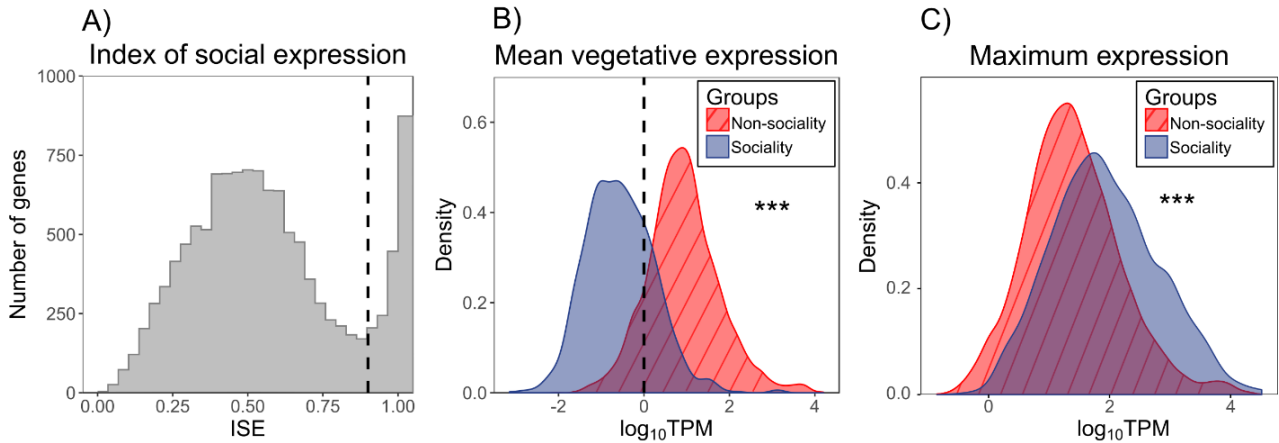

**Supplementary Figure 2.** Identification and characterization of sociality genes. **A)** Distribution of values for the Index of Social Expression (ISE). The dashed line represents the cutoff of ISE = 0.9 used to define sociality (ISE > 0.9) and non-sociality (ISE ≤ 0.9) genes. **B)** Sociality genes have little or no expression during vegetative growth (Kolmogorov-Smirnov test:  $p < 10^{-15}$ ), suggesting that they are conditional to the social stage. **C)** Although conditional to a fraction of generations, sociality genes are usually required at high levels when expressed (Kolmogorov-Smirnov test:  $p < 10^{-15}$ ). Note that the x-axis ranges differ in parts B and C, which reflects differences in the properties of mean versus maximum expression.

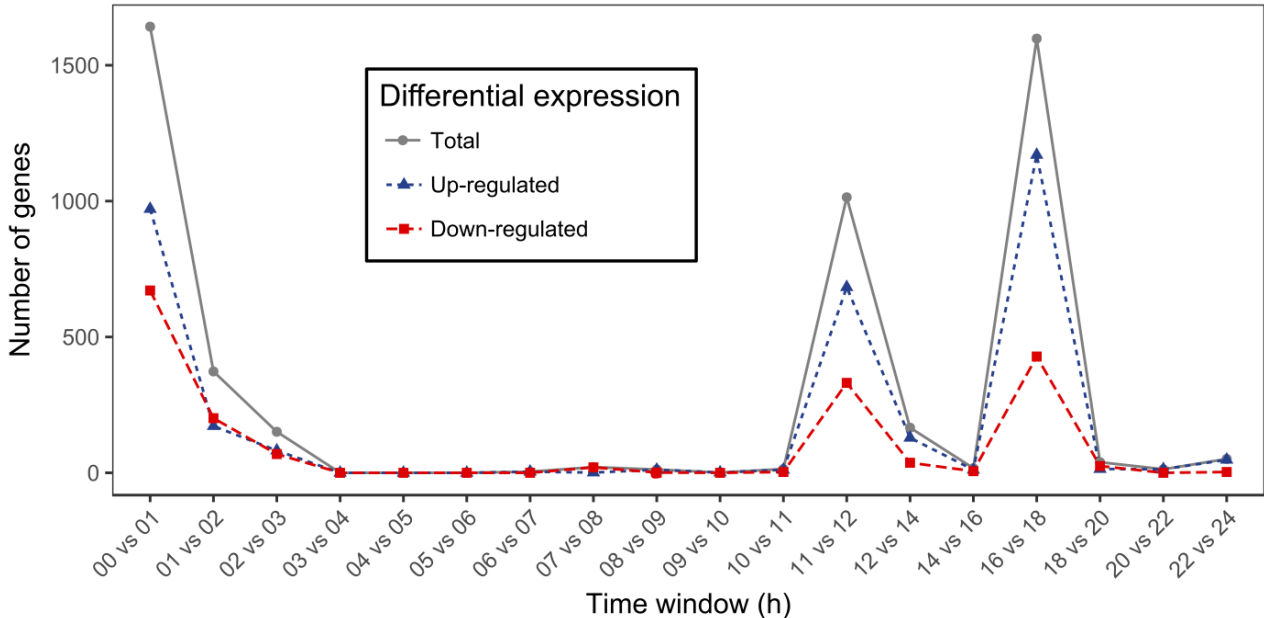

**Supplementary Figure 3.** Sliding window analysis of differential expression. By computing the number of differentially expressed genes between a given time point and the subsequent one ( $t$  versus  $t+1$ ), an analysis of the developmental transcriptome reveals three major points of global changes in expression patterns. The first step marks the beginning of development (00-01h), suggesting that conditional expression of developmental genes is observed as early as within the first hour of starvation. The second and third peaks are related to switches from loose aggregates to multicellularity (11-12h) and beginning of culmination (16-18h), respectively (see ref. 1). Note that time windows progress in one-hour intervals until hour 12, after which they progress in two-hour intervals through to hour 24.

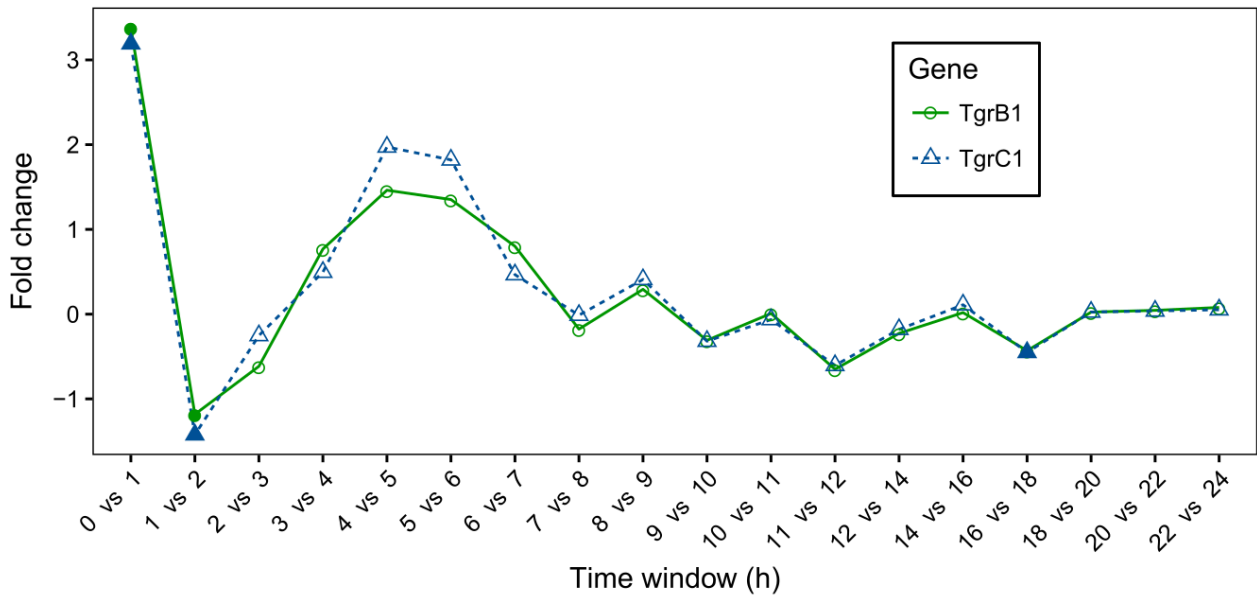

**Supplementary Figure 4.** Differential expression of *Tgr* genes through development. The pair of developmental genes *TgrB1* and *TgrC1* is up-regulated (filled symbols, positive fold change) on the onset of development, between the vegetative stage and the first hour of starvation. They are further down-regulated between hours 1 and 2, and again at the beginning of culmination (hours 16 and 18) (filled symbols, negative fold change). In other time points, transcripts of these genes are accumulated and increase levels, but are not differentially expressed (empty symbols).

**Supplementary Table 1.** GO enrichment analysis for sociality genes. We used a randomization procedure to test whether this group of genes is enriched for GO terms of biological process, cellular component and molecular function. For each GO term, we generated a set of 10,000 random groups of size  $N$  (where  $N$  is the number of sociality genes) sampled from a set that contains sociality genes and its corresponding background set of genes. In each randomization we computed the number of genes associated to the GO term being tested and used the distribution of the counts across randomizations to calculate the one-tail p-values. Only terms overrepresented among sociality genes after *FDR* correction are shown.

| GOID                      | GO Term                                                                                               | Obs | Exp     | <i>P</i>          | FDR <i>p</i>      |
|---------------------------|-------------------------------------------------------------------------------------------------------|-----|---------|-------------------|-------------------|
| <b>Biological Process</b> |                                                                                                       |     |         |                   |                   |
| GO:0030198                | extracellular matrix organization                                                                     | 29  | 4.6     | <10 <sup>-4</sup> | <10 <sup>-4</sup> |
| GO:0030435                | sporulation resulting in formation of a cellular spore                                                | 24  | 10.26   | <10 <sup>-4</sup> | <10 <sup>-4</sup> |
| GO:0031154                | culmination involved in sorocarp development                                                          | 28  | 12.71   | <10 <sup>-4</sup> | <10 <sup>-4</sup> |
| GO:1902168                | response to catechin                                                                                  | 7   | 1.38    | <10 <sup>-4</sup> | <10 <sup>-4</sup> |
| GO:0008150                | biological_process                                                                                    | 411 | 263.12  | <10 <sup>-4</sup> | <10 <sup>-4</sup> |
| GO:000NABP                | no biological process annotation                                                                      | 803 | 695.64  | <10 <sup>-4</sup> | <10 <sup>-4</sup> |
| <b>Cellular Component</b> |                                                                                                       |     |         |                   |                   |
| GO:0005576                | extracellular region                                                                                  | 83  | 26.82   | <10 <sup>-4</sup> | <10 <sup>-4</sup> |
| GO:0016021                | integral component of membrane                                                                        | 369 | 308.21  | <10 <sup>-4</sup> | <10 <sup>-4</sup> |
| GO:0031012                | extracellular matrix                                                                                  | 30  | 4.84    | <10 <sup>-4</sup> | <10 <sup>-4</sup> |
| GO:0005575                | cellular_component                                                                                    | 438 | 318.09  | <10 <sup>-4</sup> | <10 <sup>-4</sup> |
| GO:000NACC                | no cellular component annotation                                                                      | 702 | 630.71  | 0.0002            | 0.0264            |
| <b>Molecular Function</b> |                                                                                                       |     |         |                   |                   |
| GO:0004497                | monooxygenase activity                                                                                | 27  | 8.62    | <10 <sup>-4</sup> | <10 <sup>-4</sup> |
| GO:0004553                | hydrolase activity, hydrolyzing O-glycosyl compounds                                                  | 25  | 9.18    | <10 <sup>-4</sup> | <10 <sup>-4</sup> |
| GO:0005201                | extracellular matrix structural constituent                                                           | 27  | 4.41    | <10 <sup>-4</sup> | <10 <sup>-4</sup> |
| GO:0005506                | iron ion binding                                                                                      | 23  | 9.73    | <10 <sup>-4</sup> | <10 <sup>-4</sup> |
| GO:0016705                | oxidoreductase activity, acting on paired donors, with incorporation or reduction of molecular oxygen | 21  | 6.96    | <10 <sup>-4</sup> | <10 <sup>-4</sup> |
| GO:0020037                | heme binding                                                                                          | 26  | 10.02   | <10 <sup>-4</sup> | <10 <sup>-4</sup> |
| GO:0030246                | carbohydrate binding                                                                                  | 43  | 14.42   | <10 <sup>-4</sup> | <10 <sup>-4</sup> |
| GO:0001646                | cAMP receptor activity                                                                                | 6   | 1.11    | 0.0001            | 0.0159            |
| GO:0030248                | cellulose binding                                                                                     | 28  | 14.05   | 0.0003            | 0.0433            |
| GO:0003674                | molecular_function                                                                                    | 370 | 268.910 | <10 <sup>-4</sup> | <10 <sup>-4</sup> |
| GO:000NAMF                | no molecular function annotation                                                                      | 786 | 669.990 | <10 <sup>-4</sup> | <10 <sup>-4</sup> |

**Supplementary Table 2.** GO enrichment analysis for chimerism genes. We used a randomization procedure to test whether this group of genes is enriched for GO terms of biological process, cellular component and molecular function. For each GO term, we generated a set of 10,000 random groups of size  $N$  (where  $N$  is the number of chimerism genes) sampled from a set that contains chimerism genes and its corresponding background set of genes. In each randomization we computed the number of genes associated to the GO term being tested and used the distribution of the counts across randomizations to calculate the one-tail  $p$ -values. Only terms overrepresented among chimerism genes after  $FDR$  correction are shown.

| GOID       | GO Term                                                 | Obs | Exp  | $P$               | FDR $p$           |
|------------|---------------------------------------------------------|-----|------|-------------------|-------------------|
|            | <b>Biological Process</b>                               |     |      |                   |                   |
| GO:0006096 | glycolytic process                                      | 6   | 0.29 | <10 <sup>-4</sup> | <10 <sup>-4</sup> |
| GO:0006099 | tricarboxylic acid cycle                                | 7   | 0.40 | <10 <sup>-4</sup> | <10 <sup>-4</sup> |
| GO:0006108 | malate metabolic process                                | 4   | 0.10 | <10 <sup>-4</sup> | <10 <sup>-4</sup> |
| GO:0006164 | purine nucleotide biosynthetic process                  | 5   | 0.18 | <10 <sup>-4</sup> | <10 <sup>-4</sup> |
| GO:0006338 | chromatin remodeling                                    | 4   | 0.28 | <10 <sup>-4</sup> | <10 <sup>-4</sup> |
| GO:0006457 | protein folding                                         | 12  | 1.21 | <10 <sup>-4</sup> | <10 <sup>-4</sup> |
| GO:0006458 | 'de novo' protein folding                               | 5   | 0.29 | <10 <sup>-4</sup> | <10 <sup>-4</sup> |
| GO:0006471 | protein ADP-ribosylation                                | 3   | 0.09 | <10 <sup>-4</sup> | <10 <sup>-4</sup> |
| GO:0006520 | cellular amino acid metabolic process                   | 5   | 0.18 | <10 <sup>-4</sup> | <10 <sup>-4</sup> |
| GO:0006531 | aspartate metabolic process                             | 2   | 0.03 | <10 <sup>-4</sup> | <10 <sup>-4</sup> |
| GO:0006532 | aspartate biosynthetic process                          | 3   | 0.05 | <10 <sup>-4</sup> | <10 <sup>-4</sup> |
| GO:0006536 | glutamate metabolic process                             | 3   | 0.09 | <10 <sup>-4</sup> | <10 <sup>-4</sup> |
| GO:0008152 | metabolic process                                       | 24  | 5.67 | <10 <sup>-4</sup> | <10 <sup>-4</sup> |
| GO:0009408 | response to heat                                        | 4   | 0.15 | <10 <sup>-4</sup> | <10 <sup>-4</sup> |
| GO:0031589 | cell-substrate adhesion                                 | 5   | 0.46 | <10 <sup>-4</sup> | <10 <sup>-4</sup> |
| GO:0046689 | response to mercury ion                                 | 6   | 0.76 | <10 <sup>-4</sup> | <10 <sup>-4</sup> |
| GO:0055114 | oxidation-reduction process                             | 22  | 6.70 | <10 <sup>-4</sup> | <10 <sup>-4</sup> |
| GO:0061077 | chaperone-mediated protein folding                      | 5   | 0.44 | <10 <sup>-4</sup> | <10 <sup>-4</sup> |
| GO:0000492 | box C/D snoRNP assembly                                 | 2   | 0.03 | 0.0001            | 0.0092            |
| GO:0006189 | 'de novo' IMP biosynthetic process                      | 3   | 0.11 | 0.0001            | 0.0092            |
| GO:0030435 | sporulation resulting in formation of a cellular spore  | 7   | 1.18 | 0.0001            | 0.0092            |
| GO:0070212 | protein poly-ADP-ribosylation                           | 2   | 0.03 | 0.0001            | 0.0092            |
| GO:0008652 | cellular amino acid biosynthetic process                | 4   | 0.32 | 0.0002            | 0.0168            |
| GO:0019752 | carboxylic acid metabolic process                       | 3   | 0.17 | 0.0002            | 0.0168            |
| GO:0006807 | nitrogen compound metabolic process                     | 3   | 0.18 | 0.0003            | 0.0216            |
| GO:0010421 | hydrogen peroxide-mediated programmed cell death        | 3   | 0.14 | 0.0003            | 0.0216            |
| GO:0010918 | positive regulation of mitochondrial membrane potential | 3   | 0.14 | 0.0003            | 0.0216            |
| GO:0019538 | protein metabolic process                               | 2   | 0.03 | 0.0003            | 0.0216            |
| GO:0006094 | gluconeogenesis                                         | 3   | 0.16 | 0.0004            | 0.0269            |
| GO:0009617 | response to bacterium                                   | 6   | 0.99 | 0.0004            | 0.0269            |
| GO:0000398 | mRNA splicing, via spliceosome                          | 6   | 1.04 | 0.0005            | 0.0315            |
| GO:0046956 | positive phototaxis                                     | 3   | 0.17 | 0.0005            | 0.0315            |
| GO:0006538 | glutamate catabolic process                             | 2   | 0.05 | 0.0007            | 0.0415            |

|            |                                     |   |      |        |        |
|------------|-------------------------------------|---|------|--------|--------|
| GO:0046847 | filopodium assembly                 | 3 | 0.21 | 0.0007 | 0.0415 |
| GO:0006734 | NADH metabolic process              | 2 | 0.05 | 0.0008 | 0.0448 |
| GO:0051103 | DNA ligation involved in DNA repair | 3 | 0.17 | 0.0008 | 0.0448 |
| GO:0006273 | lagging strand elongation           | 3 | 0.19 | 0.0009 | 0.0491 |

### Cellular Component

|            |                                                 |    |       |                   |                   |
|------------|-------------------------------------------------|----|-------|-------------------|-------------------|
| GO:0005634 | Nucleus                                         | 33 | 16.65 | <10 <sup>-4</sup> | <10 <sup>-4</sup> |
| GO:0005681 | spliceosomal complex                            | 6  | 0.94  | <10 <sup>-4</sup> | <10 <sup>-4</sup> |
| GO:0005737 | cytoplasm                                       | 61 | 19.66 | <10 <sup>-4</sup> | <10 <sup>-4</sup> |
| GO:0005739 | mitochondrion                                   | 19 | 6.13  | <10 <sup>-4</sup> | <10 <sup>-4</sup> |
| GO:0005759 | mitochondrial matrix                            | 7  | 1.05  | <10 <sup>-4</sup> | <10 <sup>-4</sup> |
| GO:0005829 | Cytosol                                         | 21 | 5.27  | <10 <sup>-4</sup> | <10 <sup>-4</sup> |
| GO:0045335 | phagocytic vesicle                              | 34 | 4.87  | <10 <sup>-4</sup> | <10 <sup>-4</sup> |
| GO:0097255 | R2TP complex                                    | 2  | 0.03  | <10 <sup>-4</sup> | <10 <sup>-4</sup> |
| GO:0005832 | chaperonin-containing T-complex                 | 5  | 0.21  | 0.0001            | 0.0073            |
| GO:0000812 | Swr1 complex                                    | 2  | 0.05  | 0.0004            | 0.0264            |
| GO:0008540 | proteasome regulatory particle, base subcomplex | 3  | 0.17  | 0.0006            | 0.0330            |
| GO:0044613 | nuclear pore central transport channel          | 2  | 0.05  | 0.0006            | 0.0330            |

### Molecular Function

|            |                                                                                                 |    |       |                   |                   |
|------------|-------------------------------------------------------------------------------------------------|----|-------|-------------------|-------------------|
| GO:0000166 | nucleotide binding                                                                              | 41 | 16.93 | <10 <sup>-4</sup> | <10 <sup>-4</sup> |
| GO:0003824 | catalytic activity                                                                              | 32 | 6.88  | <10 <sup>-4</sup> | <10 <sup>-4</sup> |
| GO:0004069 | L-aspartate:2-oxoglutarate aminotransferase activity                                            | 2  | 0.03  | <10 <sup>-4</sup> | <10 <sup>-4</sup> |
| GO:0004352 | glutamate dehydrogenase (NAD <sup>+</sup> ) activity                                            | 2  | 0.03  | <10 <sup>-4</sup> | <10 <sup>-4</sup> |
| GO:0005524 | ATP binding                                                                                     | 44 | 13.51 | <10 <sup>-4</sup> | <10 <sup>-4</sup> |
| GO:0016491 | oxidoreductase activity                                                                         | 22 | 6.78  | <10 <sup>-4</sup> | <10 <sup>-4</sup> |
| GO:0016874 | ligase activity                                                                                 | 9  | 1.46  | <10 <sup>-4</sup> | <10 <sup>-4</sup> |
| GO:0030170 | pyridoxal phosphate binding                                                                     | 6  | 0.67  | <10 <sup>-4</sup> | <10 <sup>-4</sup> |
| GO:0044183 | protein binding involved in protein folding                                                     | 5  | 0.31  | <10 <sup>-4</sup> | <10 <sup>-4</sup> |
| GO:0051082 | unfolded protein binding                                                                        | 12 | 0.81  | <10 <sup>-4</sup> | <10 <sup>-4</sup> |
| GO:0031072 | heat shock protein binding                                                                      | 3  | 0.08  | 0.0001            | 0.0144            |
| GO:0004386 | helicase activity                                                                               | 6  | 1.09  | 0.0003            | 0.0340            |
| GO:0008483 | transaminase activity                                                                           | 4  | 0.25  | 0.0003            | 0.0340            |
| GO:0016620 | oxidoreductase activity, acting on the aldehyde or oxo group of donors, NAD or NADP as acceptor | 4  | 0.23  | 0.0003            | 0.0340            |

---



**Supplementary Table 3.** GO enrichment analysis for antagonism genes. We used a randomization procedure to test whether this group of genes is enriched for GO terms of biological process, cellular component and molecular function. For each GO term, we generated a set of 10,000 random groups of size  $N$  (where  $N$  is the number of antagonism genes) sampled from a set that contains antagonism genes and its corresponding background set of genes. In each randomization we computed the number of genes associated to the GO term being tested and used the distribution of the counts across randomizations to calculate the one-tail  $p$ -values. Only terms overrepresented among antagonism genes after  $FDR$  correction are shown.

| GOID                      | GO Term                         | Obs | Exp    | $P$        | FDR $p$    |
|---------------------------|---------------------------------|-----|--------|------------|------------|
| <b>Biological Process</b> |                                 |     |        |            |            |
| GO:0008299                | isoprenoid biosynthetic process | 9   | 2.22   | $<10^{-4}$ | $<10^{-4}$ |
| GO:0008150                | biological_process              | 382 | 300.70 | $<10^{-4}$ | $<10^{-4}$ |
| <b>Cellular Component</b> |                                 |     |        |            |            |
| GO:0005856                | cytoskeleton                    | 42  | 22.85  | $<10^{-4}$ | $<10^{-4}$ |
| GO:0005938                | cell cortex                     | 34  | 16.96  | $<10^{-4}$ | $<10^{-4}$ |
| GO:0016020                | membrane                        | 473 | 400.65 | $<10^{-4}$ | $<10^{-4}$ |
| GO:0016021                | integral component of membrane  | 427 | 352.00 | $<10^{-4}$ | $<10^{-4}$ |
| GO:0005576                | extracellular region            | 57  | 30.58  | 0.0001     | 0.0082     |
| GO:0005615                | extracellular space             | 87  | 59.78  | 0.0001     | 0.0082     |
| GO:0042995                | cell projection                 | 12  | 3.97   | 0.0001     | 0.0082     |
| GO:0005575                | cellular_component              | 441 | 363.13 | $<10^{-4}$ | $<10^{-4}$ |
| <b>Molecular Function</b> |                                 |     |        |            |            |
| GO:0003779                | actin binding                   | 42  | 19.60  | $<10^{-4}$ | $<10^{-4}$ |
| GO:0005515                | protein binding                 | 67  | 42.59  | $<10^{-4}$ | $<10^{-4}$ |
| GO:0003674                | molecular_function              | 375 | 307.12 | $<10^{-4}$ | $<10^{-4}$ |

**Supplementary Table 4.** GO enrichment analysis for cheater genes. We used a randomization procedure to test whether this group of genes is enriched for GO terms of biological process, cellular component and molecular function. For each GO term, we generated a set of 10,000 random groups of size  $N$  (where  $N$  is the number of cheater genes) sampled from a set that contains cheater genes and its corresponding background set of genes. In each randomization we computed the number of genes associated to the GO term being tested and used the distribution of the counts across randomizations to calculate the one-tail  $p$ -values. Only terms overrepresented among cheater genes after  $FDR$  correction are shown.

| GOID                      | GO Term            | Obs | Exp   | $P$        | FDR $p$    |
|---------------------------|--------------------|-----|-------|------------|------------|
| <b>Biological Process</b> |                    |     |       |            |            |
| GO:0035176                | social behavior    | 24  | 0.23  | $<10^{-4}$ | $<10^{-4}$ |
| <b>Cellular Component</b> |                    |     |       |            |            |
| GO:0005575                | cellular_component | 35  | 17.55 | $<10^{-4}$ | $<10^{-4}$ |
| <b>Molecular Function</b> |                    |     |       |            |            |
| GO:0016301                | kinase activity    | 11  | 2.58  | $<10^{-4}$ | $<10^{-4}$ |

**Supplementary Table 5.** Average number of SNPs (SNP/site) for social genes. Expected values and the respective two-tailed  $p$ -values were obtained from randomization distributions. For each group of social genes, we generated a set of 10,000 random groups of size  $N$  (where  $N$  is the number of genes in that particular group) sampled from a set that contains that group of social genes and its corresponding background set of genes (for the prespore and prestalk, the background for each is the combination of the two categories). Two-tailed  $p$ -values are defined as the probability of obtaining a mean as extreme as the observed only due to chance. Significant  $p$ -values after  $FDR$  correction for multiple tests are highlighted in bold ( $FDR < 0.05$ ).  $FDR$  correction was done in two separate sets, one for the four main classes of genes and a second set that included these four plus the  $p$ -values from the prespore and prestalk analysis (since this is a nested analysis). Values smaller than  $10^{-5}$  are listed as zeros.

| Sites              | Group              | Expected ( $\times 10^{-3}$ ) | Observed ( $\times 10^{-3}$ ) | $p$ ( $FDR$ )    |
|--------------------|--------------------|-------------------------------|-------------------------------|------------------|
| CDS                | Sociality          | 4.70                          | 7.28                          | <b>&lt;0.001</b> |
|                    | Chimerism          | 4.56                          | 4.41                          | 0.74             |
|                    | Antagonism         | 4.70                          | 5.15                          | <b>&lt;0.001</b> |
|                    | Prespore           | 5.03                          | 5.32                          | 0.071            |
|                    | Prestalk           | 5.02                          | 4.75                          | 0.071            |
|                    | <i>Presp-Prest</i> | 0                             | 0.57                          | 0.071            |
|                    | Cheater            | 4.69                          | 5.07                          | 0.56             |
|                    | Nonsynonymous      | Sociality                     | 3.72                          | 6.35             |
| Chimerism          |                    | 3.55                          | 3.20                          | 0.47             |
| Antagonism         |                    | 3.73                          | 4.18                          | <b>&lt;0.001</b> |
| Prespore           |                    | 4.01                          | 4.29                          | 0.071            |
| Prestalk           |                    | 4.01                          | 3.74                          | 0.071            |
| <i>Presp-Prest</i> |                    | 0                             | 0.55                          | 0.071            |
| Cheater            |                    | 3.72                          | 4.20                          | 0.47             |
| Synonymous         |                    | Sociality                     | 8.10                          | 10.52            |
|                    | Chimerism          | 8.08                          | 8.66                          | 0.47             |
|                    | Antagonism         | 8.11                          | 8.55                          | <b>0.034</b>     |
|                    | Prespore           | 8.59                          | 8.92                          | 0.17             |
|                    | Prestalk           | 8.59                          | 8.26                          | 0.17             |
|                    | <i>Presp-Prest</i> | 0                             | 0.66                          | 0.17             |
|                    | Cheater            | 8.08                          | 8.14                          | 0.95             |

**Supplementary Table 6.** Comparison of observed and expected evolutionary parameters for sociality and antagonism genes based on the presence of each class in the other. Expected values and probabilities ( $p$ ) are from 10,000 random permutations where genes were randomly sampled such that the final set had the same proportion of genes coming from the other class as that observed in the original data. For example, in the case of the sociality expected values, sets of antagonism and non-antagonism genes were sampled to create sets of 'sociality' genes contained the observed proportion of antagonism genes. For each permutation, means are expected values from a linear model that accounts for variation in expression and mapped CDS length (see Methods). Two-tailed  $p$ -values are defined as the probability of obtaining a mean as extreme as the observed only due to chance. Significant  $p$ -values after  $FDR$  correction for multiple tests are highlighted in bold ( $FDR < 0.05$ ). \*parameter values that have been multiplied by  $10^3$ .

| Parameter      | Sociality (expected) | Sociality (observed) | $p$ sociality    | Antagonism (expected) | Antagonism (observed) | $p$ antagonism |
|----------------|----------------------|----------------------|------------------|-----------------------|-----------------------|----------------|
| $\pi$ /site*   | 0.77                 | 12.00                | <b>&lt;0.001</b> | 0.79                  | 0.83                  | 0.45           |
| $\pi_a$ /site* | 0.60                 | 1.04                 | <b>&lt;0.001</b> | 0.63                  | 0.65                  | 0.52           |
| $\pi_s$ /site* | 1.35                 | 1.80                 | <b>&lt;0.001</b> | 1.28                  | 1.30                  | 0.17           |
| SNP/site       | 4.81                 | 7.28                 | <b>&lt;0.001</b> | 5.03                  | 5.15                  | 0.51           |
| SNP/site       | 3.83                 | 6.35                 | <b>&lt;0.001</b> | 4.07                  | 4.18                  | 0.46           |
| SNP/site       | 8.21                 | 10.52                | <b>&lt;0.001</b> | 8.40                  | 8.54                  | 0.55           |
| $K_a/K_s$      | 0.21                 | 0.28                 | <b>&lt;0.001</b> | 0.21                  | 0.21                  | 0.84           |
| $K_a$          | 1.01                 | 1.53                 | <b>&lt;0.001</b> | 1.05                  | 1.09                  | 0.52           |
| $K_s$          | 6.91                 | 8.97                 | <b>&lt;0.001</b> | 7.05                  | 7.15                  | 0.64           |

**Supplementary Table 7.** Comparison of observed and expected evolutionary parameters for antagonism genes with all sociality genes removed from the set. Expected values and the respective two-tailed  $p$ -values were obtained from randomization distributions. For each randomization, we generated a set of 10,000 random groups of size  $N$  (where  $N$  is the number of genes in that particular group) sampled from a set that contained antagonism genes and their appropriate background set, but with all sociality genes removed. Two-tailed  $p$ -values are defined as the probability of obtaining a mean as extreme as the observed only due to chance. Significant  $p$ -values after  $FDR$  correction for multiple tests are highlighted in bold ( $FDR < 0.05$ ). The observed and expected values for the full set of antagonism genes ('all') are shown for comparison. \*parameter values have been multiplied by  $10^3$ .

| Parameter             | Expected | Observed | $p$ (FDR) | Expected (all) | Observed (all) |
|-----------------------|----------|----------|-----------|----------------|----------------|
| $\pi$ /site*          | 0.70     | 0.72     | 0.91      | 0.75           | 0.82           |
| $\pi_a$ /site*        | 0.53     | 0.54     | 0.91      | 0.58           | 0.65           |
| $\pi_s$ /site*        | 1.27     | 1.34     | 0.73      | 1.32           | 1.44           |
| SNP/site (CDS)*       | 4.33     | 4.32     | 0.91      | 4.70           | 5.15           |
| SNP/site (nonsynon.)* | 3.36     | 3.34     | 0.91      | 3.73           | 4.18           |
| SNP/site (synon.)*    | 7.80     | 7.85     | 0.91      | 8.11           | 8.55           |
| $K_a/K_s$             | 0.20     | 0.19     | 0.91      | 0.21           | 0.22           |
| $K_a^*$               | 0.94     | 0.95     | 0.91      | 0.99           | 1.09           |
| $K_s^*$               | 6.61     | 6.64     | 0.91      | 6.86           | 7.15           |

**Supplementary Table 8.** Comparison of observed and expected evolutionary parameters for sociality genes with all antagonism genes removed from the set. Expected values and the respective two-tailed  $p$ -values were obtained from randomization distributions. For each randomization, we generated a set of 10,000 random groups of size  $N$  (where  $N$  is the number of genes in that particular group) sampled from a set that contained sociality genes and their appropriate background set, but with all antagonism genes removed. Two-tailed  $p$ -values are defined as the probability of obtaining a mean as extreme as the observed only due to chance. Significant  $p$ -values after  $FDR$  correction for multiple tests are highlighted in bold ( $FDR < 0.05$ ). The observed and expected values for the full set of sociality genes ('all') are shown for comparison. \*parameter values have been multiplied by  $10^3$ .

| Parameter             | Expected | Observed | $p$<br>(FDR)     | Expected<br>(all) | Observed<br>(all) |
|-----------------------|----------|----------|------------------|-------------------|-------------------|
| $\pi$ /site*          | 0.71     | 1.18     | <b>&lt;0.001</b> | 0.73              | 1.21              |
| $\pi_a$ /site*        | 0.56     | 1.02     | <b>&lt;0.001</b> | 0.55              | 1.04              |
| $\pi_s$ /site*        | 1.27     | 1.80     | <b>&lt;0.001</b> | 1.33              | 1.84              |
| SNP/site (CDS)*       | 4.56     | 6.91     | <b>&lt;0.001</b> | 4.70              | 7.28              |
| SNP/site (nonsynon.)* | 3.59     | 6.00     | <b>&lt;0.001</b> | 3.72              | 6.35              |
| SNP/site (synon.)*    | 8.00     | 10.14    | <b>&lt;0.001</b> | 8.10              | 10.52             |
| $K_a/K_s$             | 0.21     | 0.26     | <b>0.022</b>     | 0.18              | 0.27              |
| $K_a^*$               | 0.97     | 1.47     | <b>&lt;0.001</b> | 0.90              | 1.47              |
| $K_s^*$               | 6.66     | 8.88     | <b>&lt;0.001</b> | 6.90              | 8.98              |

**Supplementary Table 9.** Comparison of evolutionary parameters at the subset of sociality genes [Obs (Schilde)] relative to the background of all of the genes identified by Schilde et al.<sup>5</sup> [Exp (Schilde)]. Two-tailed  $p$ -values are defined as the probability of obtaining a mean as extreme as the observed value due to chance. Significant  $p$ -values after  $FDR$  correction for multiple tests are highlighted in bold ( $FDR < 0.05$ ). The observed values of each parameter measured in the full set of sociality genes [Obs (all)] and the value expected from the full set of genes [Exp (all)] are shown for comparison. \*parameter values have been multiplied by  $10^3$ .

| Parameter         | Exp (Schilde) | Obs (Schilde) | $p$ (FDR)        | Exp (all) | Obs (all) |
|-------------------|---------------|---------------|------------------|-----------|-----------|
| $\pi$ /site*      | 0.74          | 0.90          | <b>&lt;0.001</b> | 0.73      | 1.21      |
| $\pi_a$ /site*    | 0.55          | 0.69          | <b>&lt;0.001</b> | 0.55      | 1.04      |
| $\pi_s$ /site*    | 1.37          | 1.59          | <b>0.002</b>     | 1.33      | 1.84      |
| Tajima's $D$      | -0.71         | -0.70         | 0.82             | -0.65     | -0.71     |
| $K_a/K_s$         | 0.16          | 0.17          | 0.70             | 0.18      | 0.27      |
| $K_a^*$           | 0.91          | 1.07          | <b>0.005</b>     | 0.90      | 1.47      |
| $K_s^*$           | 8.10          | 9.76          | <b>&lt;0.001</b> | 6.90      | 8.98      |
| DoS               | -0.044        | -0.066        | 0.13             | -0.022    | -0.054    |
| $D_n/(D_n + D_s)$ | 0.54          | 0.55          | 0.66             | 0.55      | 0.59      |
| $P_n/(P_n + P_s)$ | 0.59          | 0.61          | <b>0.005</b>     | 0.58      | 0.65      |

**Supplementary Table 10.** Comparison of evolutionary parameters for sociality genes (Obs) compared to the relevant background set of genes (Exp) in a subset of genes that excludes those in the bottom quartile of expression. Two-tailed  $p$ -values are defined as the probability of obtaining a mean as extreme as the observed only due to chance. Significant  $p$ -values after  $FDR$  correction for multiple tests are highlighted in bold ( $FDR < 0.05$ ). The observed values of each parameter measured in the full set of sociality genes [Obs (all)] and the value expected from the full set of background genes [Exp (all)] are shown for comparison. \*parameter values have been multiplied by  $10^3$ .

| Parameter         | Exp (no low) | Obs (no low) | $p$ ( $FDR$ )    | Exp (all) | Obs (all) |
|-------------------|--------------|--------------|------------------|-----------|-----------|
| $\pi$ /site*      | 0.72         | 1.19         | <b>&lt;0.001</b> | 0.73      | 1.21      |
| $\pi_a$ /site*    | 0.54         | 1.02         | <b>&lt;0.001</b> | 0.55      | 1.04      |
| $\pi_s$ /site*    | 1.32         | 1.84         | <b>&lt;0.001</b> | 1.33      | 1.84      |
| Tajima's $D$      | -0.64        | -0.74        | <b>&lt;0.001</b> | -0.65     | -0.71     |
| $K_a/K_s$         | 0.17         | 0.24         | <b>&lt;0.001</b> | 0.18      | 0.27      |
| $K_a^*$           | 0.87         | 1.41         | <b>&lt;0.001</b> | 0.90      | 1.47      |
| $K_s^*$           | 6.95         | 9.05         | <b>&lt;0.001</b> | 6.90      | 8.98      |
| DoS               | -0.018       | -0.045       | <b>0.045</b>     | -0.022    | -0.054    |
| $D_n/(D_n + D_s)$ | 0.55         | 0.59         | <b>0.002</b>     | 0.55      | 0.59      |
| $P_n/(P_n + P_s)$ | 0.57         | 0.64         | <b>&lt;0.001</b> | 0.58      | 0.65      |

**Supplementary Table 11.** Correlations between the index of social expression (ISE) and the set of evolutionary parameters that differ between sociality and the background set of genes. Two-tailed  $p$ -values are defined as the probability of obtaining a mean as extreme as the observed only due to chance. Significant  $p$ -values after  $FDR$  correction for multiple tests are highlighted in bold ( $FDR < 0.05$ ).

| Parameter         | Correlation | $p$ ( $FDR$ ) |
|-------------------|-------------|---------------|
| $\pi$ /site       | 0.010       | 0.302         |
| $\pi_a$ /site     | 0.022       | 0.112         |
| $\pi_s$ /site     | -0.018      | 0.136         |
| $K_a$             | -0.034      | 0.112         |
| $K_s$             | -0.023      | 0.153         |
| $D_n/(D_n + D_s)$ | 0.014       | 0.302         |
| $P_n/(P_n + P_s)$ | 0.019       | 0.136         |

**Supplementary Table 12.** Comparison of evolutionary parameters for conditional genes (observed) compared to those expected. Two-tailed  $p$ -values are defined as the probability of obtaining a mean as extreme as the observed only due to chance. Significant  $p$ -values after  $FDR$  correction for multiple tests are highlighted in bold ( $FDR < 0.05$ ). For comparison the observed values of each parameter measured in the sociality genes and the value expected from the background set of genes used in the analysis of sociality genes are shown. \*parameter values have been multiplied by  $10^3$ .

| Parameter             | Exp (no low) | Obs (no low) | $p$ ( $FDR$ )    | Exp (all) | Obs (all) |
|-----------------------|--------------|--------------|------------------|-----------|-----------|
| $\pi/\text{site}^*$   | 0.76         | 1.21         | <b>&lt;0.001</b> | 0.73      | 1.21      |
| $\pi_a/\text{site}^*$ | 0.60         | 1.09         | <b>&lt;0.001</b> | 0.55      | 1.04      |
| $\pi_s/\text{site}^*$ | 1.28         | 1.67         | <b>&lt;0.001</b> | 1.33      | 1.84      |
| Tajima's $D$          | -0.62        | -0.63        | 0.82             | -0.65     | -0.71     |
| $K_a/K_s$             | 0.21         | 0.50         | <b>&lt;0.001</b> | 0.18      | 0.27      |
| $K_a^*$               | 1.29         | 2.88         | <b>&lt;0.001</b> | 0.90      | 1.47      |
| $K_s^*$               | 8.39         | 9.51         | <b>&lt;0.001</b> | 6.90      | 8.98      |
| DoS                   | -0.013       | 0.00030      | 0.44             | -0.022    | -0.054    |
| $D_n/(D_n + D_s)$     | 0.56         | 0.65         | <b>&lt;0.001</b> | 0.55      | 0.59      |
| $P_n/(P_n + P_s)$     | 0.59         | 0.69         | <b>&lt;0.001</b> | 0.58      | 0.65      |

**Supplementary Table 13.** Complementary neutrality tests for social genes. Fu & Li's statistics compare external and internal branches of a genealogical tree. Under circumstances where variation is removed (purifying selection or recent selective sweeps), it is expected an excess of mutations in external branches (mutations segregating at low frequencies), resulting in negative values. Conversely, balancing selection maintains old alleles (inflating mutations in internal branches), resulting in positive values. Wall's *B* and *Q* statistics use linkage disequilibrium information to test whether a pair of segregating sites share the same genealogy – which would be inflated (larger values) under balancing selection. Expected values and the respective two-tailed *p*-values were obtained by a randomization process. For each group of social genes, we generated a set of 10,000 random groups of size *N* (where *N* is the number of genes in that particular group) sampled from a set that contains that group of social genes and its corresponding background set of genes. Two-tailed *p*-values are defined as the probability of obtaining a mean as extreme as the observed only due to chance after *FDR* correction for multiple tests. Values below  $10^{-4}$  are presented as zeros.

| Test                 | Group              | Expected | Observed | <i>p</i> ( <i>FDR</i> ) |
|----------------------|--------------------|----------|----------|-------------------------|
| Fu & Li's <i>F</i> * | Sociality          | -0.733   | -0.787   | 0.76                    |
|                      | Chimerism          | -0.738   | -0.713   | 0.90                    |
|                      | Antagonism         | -0.733   | -0.739   | 0.90                    |
|                      | Prespore           | -0.739   | -0.775   | 0.76                    |
|                      | Prestalk           | -0.740   | -0.704   | 0.76                    |
|                      | <i>Presp-Prest</i> | 0.0006   | -0.071   | 0.76                    |
|                      | Cheater            | -0.733   | -0.805   | 0.90                    |
| Fu & Li's <i>D</i> * | Sociality          | -0.638   | -0.678   | 0.76                    |
|                      | Chimerism          | -0.645   | -0.605   | 0.90                    |
|                      | Antagonism         | -0.637   | -0.638   | 0.99                    |
|                      | Prespore           | -0.638   | -0.665   | 0.76                    |
|                      | Prestalk           | -0.638   | -0.611   | 0.76                    |
|                      | <i>Presp-Prest</i> | 0.0006   | -0.054   | 0.76                    |
|                      | Cheater            | -0.638   | -0.676   | 0.90                    |
| Wall's <i>B</i>      | Sociality          | 0.0832   | 0.0833   | 0.99                    |
|                      | Chimerism          | 0.0822   | 0.0715   | 0.76                    |
|                      | Antagonism         | 0.0833   | 0.0790   | 0.76                    |
|                      | Prespore           | 0.0790   | 0.0777   | 0.90                    |
|                      | Prestalk           | 0.0790   | 0.0802   | 0.90                    |
|                      | <i>Presp-Prest</i> | 0        | -0.0025  | 0.90                    |
|                      | Cheater            | 0.0827   | 0.1022   | 0.76                    |
| Wall's <i>Q</i>      | Sociality          | 0.113    | 0.113    | 0.99                    |
|                      | Chimerism          | 0.112    | 0.094    | 0.76                    |
|                      | Antagonism         | 0.113    | 0.107    | 0.76                    |
|                      | Prespore           | 0.107    | 0.105    | 0.90                    |
|                      | Prestalk           | 0.107    | 0.109    | 0.90                    |
|                      | <i>Presp-Prest</i> | 0        | -0.004   | 0.90                    |
|                      | Cheater            | 0.112    | 0.132    | 0.76                    |

**Supplementary Table 14.** Enrichment analysis of social genes evolving under balancing selection as defined by different cutoffs of Tajima's  $D$ . We used a randomization procedure to test whether each of the groups of social genes contained an excess of genes evolving under balancing selection. For each group of social genes, we generated a set of 10,000 random groups of size  $N$  (where  $N$  is the number of genes in that particular group) sampled from a set that contains that group of social genes and its corresponding background set of genes. In each randomization we counted the number of genes evolving under balancing selection and used the distribution of the counts across randomizations to calculate the confidence intervals (2.5<sup>th</sup> to 97.5<sup>th</sup> percentiles).

| <b>Tajima's <math>D &gt; 2</math></b> |                                         |           |    |    |    |               |
|---------------------------------------|-----------------------------------------|-----------|----|----|----|---------------|
| Sites                                 | Group                                   | Observed  | CI |    |    | $p$ ( $FDR$ ) |
| CDS                                   | Sociality                               | 13        | 5  | 16 |    | > 0.05        |
|                                       | Chimerism                               | 1         | 0  | 4  |    | > 0.05        |
|                                       | Antagonism                              | 12        | 7  | 20 |    | > 0.05        |
|                                       | Prespore                                | 5         | 2  | 12 |    | > 0.05        |
|                                       | Prestalk                                | 7         | 3  | 12 |    | > 0.05        |
|                                       | Cheater                                 | 1         | 0  | 3  |    | > 0.05        |
|                                       | Nonsynonymous                           | Sociality | 14 | 5  | 16 |               |
| Chimerism                             |                                         | 1         | 0  | 4  |    | > 0.05        |
| Antagonism                            |                                         | 7         | 7  | 20 |    | > 0.05        |
| Prespore                              |                                         | 2         | 2  | 12 |    | > 0.05        |
| Prestalk                              |                                         | 5         | 3  | 12 |    | > 0.05        |
| Cheater                               |                                         | 1         | 0  | 3  |    | > 0.05        |
| Synonymous                            |                                         | Sociality | 11 | 5  | 16 |               |
|                                       | Chimerism                               | 0         | 0  | 4  |    | > 0.05        |
|                                       | Antagonism                              | 12        | 8  | 21 |    | > 0.05        |
|                                       | Prespore                                | 8         | 3  | 12 |    | > 0.05        |
|                                       | Prestalk                                | 4         | 2  | 12 |    | > 0.05        |
|                                       | Cheater                                 | 1         | 0  | 3  |    | > 0.05        |
|                                       | <b>Tajima's <math>D &gt; 1.5</math></b> |           |    |    |    |               |
| CDS                                   | Sociality                               | 40        | 26 | 47 |    | > 0.05        |
|                                       | Chimerism                               | 2         | 1  | 9  |    | > 0.05        |
|                                       | Antagonism                              | 47        | 36 | 60 |    | > 0.05        |
|                                       | Prespore                                | 22        | 15 | 32 |    | > 0.05        |
|                                       | Prestalk                                | 25        | 16 | 34 |    | > 0.05        |
|                                       | Cheater                                 | 1         | 0  | 6  |    | > 0.05        |
|                                       | Nonsynonymous                           | Sociality | 40 | 28 | 50 |               |
| Chimerism                             |                                         | 3         | 1  | 10 |    | > 0.05        |
| Antagonism                            |                                         | 42        | 38 | 62 |    | > 0.05        |
| Prespore                              |                                         | 14        | 15 | 33 |    | > 0.05        |
| Prestalk                              |                                         | 28        | 17 | 35 |    | > 0.05        |
| Cheater                               |                                         | 1         | 0  | 6  |    | > 0.05        |
| Synonymous                            |                                         | Sociality | 51 | 36 | 60 |               |
|                                       | Chimerism                               | 8         | 3  | 13 |    | > 0.05        |
|                                       | Antagonism                              | 68        | 52 | 80 |    | > 0.05        |
|                                       | Prespore                                | 32        | 23 | 44 |    | > 0.05        |
|                                       | Prestalk                                | 36        | 23 | 44 |    | > 0.05        |
|                                       | Cheater                                 | 1         | 0  | 7  |    | > 0.05        |
|                                       | <b>Tajima's <math>D &gt; 1</math></b>   |           |    |    |    |               |



|               |            |     |     |     |        |
|---------------|------------|-----|-----|-----|--------|
| CDS           | Sociality  | 72  | 61  | 93  | > 0.05 |
|               | Chimerism  | 6   | 5   | 17  | > 0.05 |
|               | Antagonism | 94  | 83  | 117 | > 0.05 |
|               | Prespore   | 45  | 36  | 61  | > 0.05 |
|               | Prestalk   | 49  | 39  | 66  | > 0.05 |
|               | Cheater    | 1   | 1   | 9   | > 0.05 |
| Nonsynonymous | Sociality  | 71  | 62  | 93  | > 0.05 |
|               | Chimerism  | 10  | 5   | 17  | > 0.05 |
|               | Antagonism | 91  | 81  | 116 | > 0.05 |
|               | Prespore   | 34  | 35  | 60  | > 0.05 |
|               | Prestalk   | 57  | 38  | 64  | > 0.05 |
|               | Cheater    | 3   | 1   | 10  | > 0.05 |
| Synonymous    | Sociality  | 111 | 76  | 109 | > 0.05 |
|               | Chimerism  | 13  | 8   | 22  | > 0.05 |
|               | Antagonism | 131 | 108 | 146 | > 0.05 |
|               | Prespore   | 62  | 50  | 78  | > 0.05 |
|               | Prestalk   | 69  | 49  | 77  | > 0.05 |
|               | Cheater    | 3   | 2   | 11  | > 0.05 |

**Supplementary Table 15.** Intraspecific variation in sociality genes excluding 13 genes evolving under balancing selection. Expected values and the respective two-tailed  $p$ -values were obtained from randomization distributions. We generated a set of 10,000 random groups of size  $N$  (where  $N$  is the number of genes in that particular group) sampled from a set that contains that sociality genes and its corresponding background set of genes. Significant  $p$ -values after  $FDR$  correction for multiple tests are highlighted in bold ( $FDR < 0.05$ ).

| Sites        | Estimator   | Expected ( $\times 10^{-3}$ ) | Observed ( $\times 10^{-3}$ ) | $p$ ( $FDR$ )                    |
|--------------|-------------|-------------------------------|-------------------------------|----------------------------------|
| CDS          | $\pi$ /site | 0.715                         | 1.177                         | <b>&lt; <math>10^{-4}</math></b> |
|              | SNP/site    | 4.419                         | 6.759                         | <b>&lt; <math>10^{-4}</math></b> |
| Nonsynonymou | $\pi$ /site | 0.553                         | 1.022                         | <b>&lt; <math>10^{-4}</math></b> |
|              | SNP/site    | 3.490                         | 5.896                         | <b>&lt; <math>10^{-4}</math></b> |
| Synonymous   | $\pi$ /site | 1.274                         | 1.766                         | <b>&lt; <math>10^{-4}</math></b> |
|              | SNP/site    | 7.670                         | 9.785                         | <b>&lt; <math>10^{-4}</math></b> |

**Supplementary Table 16.** Enrichment analysis of social genes showing strong signatures of selection. We used a randomization procedure to test whether each of the five groups of social genes contained an excess of genes from these two categories. For each group of social genes, we generated a set of 10,000 random groups of size  $N$  (where  $N$  is the number of genes in that particular group) sampled from a set that contains that group of social genes and its corresponding background set of genes. In each randomization we counted the number of genes evolving under these forms of selection and used the distribution of the counts across randomizations to calculate the confidence intervals (2.5<sup>th</sup> to 97.5<sup>th</sup> percentiles). Significant  $p$ -values after  $FDR$  correction for multiple tests are highlighted in bold ( $FDR < 0.05$ ).

| Type of selection   | Group      | Observed | CI | $p$ ( $FDR$ ) |              |
|---------------------|------------|----------|----|---------------|--------------|
| Purifying/Balancing | Sociality  | 13       | 6  | 18            | > 0.05       |
|                     | Chimerism  | 0        | 0  | 3             | > 0.05       |
|                     | Antagonism | 10       | 4  | 15            | > 0.05       |
|                     | Prespore   | 8        | 1  | 9             | > 0.05       |
|                     | Prestalk   | 8        | 1  | 9             | > 0.05       |
|                     | Cheater    | 2        | 0  | 2             | > 0.05       |
| Positive            | Sociality  | 1        | 2  | 11            | <b>0.031</b> |
|                     | Chimerism  | 2        | 0  | 3             | > 0.05       |
|                     | Antagonism | 9        | 3  | 13            | > 0.05       |
|                     | Prespore   | 6        | 1  | 8             | > 0.05       |
|                     | Prestalk   | 6        | 1  | 8             | > 0.05       |
|                     | Cheater    | 1        | 0  | 2             | > 0.05       |

**Supplementary Table 17.** Comparison of evolutionary parameters at genes showing biased expression in either prestalk and prespore cells (with expression biases of 0.8 or 0.9 shown separately) relative to the background of all of the genes expressed in the same cells (corresponding to the values plotted in Figure 4). Two-tailed  $p$ -values are defined as the probability of obtaining a mean as extreme as the observed value due to chance. Significant  $p$ -values after  $FDR$  correction for multiple tests are highlighted in bold ( $FDR < 0.05$ ). All parameter values have been multiplied by  $10^3$ .

| Type of selection | Group         | Expected | Observed | $p$ ( $FDR$ )    |
|-------------------|---------------|----------|----------|------------------|
| Bias = 0.8        | $\pi$ /site   | 0.730    | 0.956    | <b>&lt;0.001</b> |
|                   | $\pi_a$ /site | 0.567    | 0.771    | <b>&lt;0.001</b> |
|                   | $\pi_s$ /site | 1.298    | 1.612    | <b>&lt;0.001</b> |
|                   | $K_a/K_s$     | 0.208    | 0.231    | 0.26             |
|                   | $K_a$         | 0.976    | 1.250    | <b>0.001</b>     |
|                   | $K_s$         | 6.771    | 8.013    | <b>&lt;0.001</b> |
| Bias = 0.9        | $\pi$ /site   | 0.730    | 1.046    | <b>0.022</b>     |
|                   | $\pi_a$ /site | 0.567    | 0.882    | <b>0.022</b>     |
|                   | $\pi_s$ /site | 1.297    | 1.655    | <b>0.045</b>     |
|                   | $K_a/K_s$     | 0.208    | 0.234    | 0.59             |
|                   | $K_a$         | 0.978    | 1.263    | 0.15             |
|                   | $K_s$         | 6.759    | 9.586    | <b>0.001</b>     |

**Supplementary Table 18.** Evolutionary statistics for prespore and prestalk genes. Expected values and the respective two-tailed  $p$ -values were obtained from randomization distributions (sampled from a combination of prespore and prestalk genes). For each group of genes, we generated a set of 10,000 random groups of size  $N$  (where  $N$  is the number of genes in that particular group) sampled from a set that contains that group of prespore or prestalk genes and its corresponding background set of genes. Two-tailed  $p$ -values are defined as the probability of obtaining a mean as extreme as the observed only due to chance. Significant  $p$ -values after familywise  $FDR$  correction for multiple tests are highlighted in bold ( $FDR < 0.05$ ). Values listed as zero have a true value less than  $10^{-6}$ . \*parameter values have been multiplied by  $10^3$ .

| Parameter            | Group              | Expected               | Observed              | $p$ ( $FDR$ ) |
|----------------------|--------------------|------------------------|-----------------------|---------------|
| $\pi$ /site          | Prespore*          | 0.81                   | 0.84                  | 0.43          |
|                      | Prestalk*          | 0.81                   | 0.78                  | 0.43          |
|                      | <i>Presp-Prest</i> | 0                      | $6.02 \times 10^{-5}$ | 0.43          |
| $\pi_a$ /site        | Prespore*          | 0.63                   | 0.66                  | 0.52          |
|                      | Prestalk*          | 0.63                   | 0.61                  | 0.52          |
|                      | <i>Presp-Prest</i> | 0                      | $4.99 \times 10^{-6}$ | 0.52          |
| $\pi_s$ /site        | Prespore*          | 1.45                   | 1.50                  | 0.43          |
|                      | Prestalk*          | 1.45                   | 1.41                  | 0.43          |
|                      | <i>Presp-Prest</i> | 0                      | $4.65 \times 10^{-5}$ | 0.43          |
| Tajima's $D$<br>CDS  | Prespore           | -0.66                  | -0.70                 | 0.27          |
|                      | Prestalk           | -0.66                  | -0.63                 | 0.27          |
|                      | <i>Presp-Prest</i> | $0.14 \times 10^{-3}$  | -0.073                | 0.27          |
| Tajima's $D$<br>Nsyn | Prespore           | -0.67                  | -0.72                 | 0.14          |
|                      | Prestalk           | -0.67                  | -0.62                 | 0.14          |
|                      | <i>Presp-Prest</i> | $0.23 \times 10^{-3}$  | -0.11                 | 0.14          |
| Tajima's $D$<br>Syn  | Prespore           | -0.44                  | -0.47                 | 0.43          |
|                      | Prestalk           | -0.44                  | -0.42                 | 0.43          |
|                      | <i>Presp-Prest</i> | $0.15 \times 10^{-3}$  | -0.051                | 0.43          |
| DoS                  | Prespore           | -0.029                 | -0.0435               | 0.33          |
|                      | Prestalk           | -0.029                 | -0.0154               | 0.33          |
|                      | <i>Presp-Prest</i> | $-0.63 \times 10^{-6}$ | -0.0281               | 0.33          |
| $P_n/(P_n+P_s)$      | Prespore           | 0.585                  | 0.585                 | 0.98          |
|                      | Prestalk           | 0.585                  | 0.585                 | 0.98          |
|                      | <i>Presp-Prest</i> | $-0.22 \times 10^{-6}$ | $0.36 \times 10^{-3}$ | 0.98          |
| $D_n/(D_n+D_s)$      | Prespore           | 0.552                  | 0.536                 | 0.27          |
|                      | Prestalk           | 0.552                  | 0.567                 | 0.27          |
|                      | <i>Presp-Prest</i> | $-0.96 \times 10^{-6}$ | -0.032                | 0.27          |
| $K_a/K_s$            | Prespore           | 0.194                  | 0.212                 | 0.27          |
|                      | Prestalk           | 0.194                  | 0.177                 | 0.27          |
|                      | <i>Presp-Prest</i> | $3.2 \times 10^{-5}$   | 0.036                 | 0.27          |
| $K_a$                | Prespore*          | 1.01                   | 1.03                  | 0.74          |
|                      | Prestalk*          | 1.01                   | 0.99                  | 0.74          |
|                      | <i>Presp-Prest</i> | 0                      | $4.1 \times 10^{-5}$  | 0.74          |
| $K_s$                | Prespore*          | 7.27                   | 6.81                  | 0.14          |
|                      | Prestalk*          | 7.27                   | 7.71                  | 0.14          |
|                      | <i>Presp-Prest</i> | 0                      | $9.1 \times 10^{-4}$  | 0.14          |

**Supplementary Table 19.** Enrichment analysis of the number of prespore and prestalk genes carrying at least one mutation that introduces a stop codon or results in a partial deletion (presence/absence variation). We used a randomization procedure to test whether each of the two groups of genes contained an excess of genes carrying these types of deleterious mutations. For each group of genes, we generated a set of 10,000 random groups of size  $N$  (where  $N$  is the number of genes in that particular group) sampled from a set that contains that group of social genes and its corresponding background set of genes. In each randomization we counted the number of genes that contained each type of deleterious mutation and used the distribution of the counts across randomizations to calculate the confidence intervals (2.5<sup>th</sup> to 97.5<sup>th</sup> percentiles) and  $p$ -values. Significant  $p$ -values after  $FDR$  correction for multiple tests are highlighted in bold ( $FDR < 0.05$ ).

| Class of mutations | Group    | Observed | CI | $p$ ( $FDR$ ) |                               |
|--------------------|----------|----------|----|---------------|-------------------------------|
| Stop codon gain    | Prespore | 1        | 1  | 8             | > 0.05                        |
|                    | Prestalk | 5        | 2  | 10            | > 0.05                        |
| Presence/Absence   | Prespore | 0        | 3  | 13            | < <b><math>10^{-3}</math></b> |
|                    | Prestalk | 0        | 4  | 14            | < <b><math>10^{-3}</math></b> |

**Supplementary Table 20.** Genome sequencing statistics for the strains included in analyses. Strain IDs match those from the Dicty Stock Center. Five of the strains (marked with an asterisk) were sequenced in two independent libraries and for these, all statistics are for the pooled set of sequences from the two libraries (note that one strain, NC60.1, was sequenced using two different read lengths). For each strain the sequencing statistics given are: the total number of reads, raw read length (before any trimming), number of non-contaminant reads (which indicates the number of reads remaining after identified contaminant were removed), mapped reads (i.e., the number mapped to the reference genome), mapped read percentage (percentage of non-contaminant reads that mapped to the reference genome), per base mean coverage across the genome (including floating contigs, mitochondrial, and ribosomal chromosomes), and per base mean coverage across chromosomes (which is the average coverage per base across the 6 canonical chromosomes, excluding floating contigs, mitochondrial and ribosomal chromosomes). The last column ('Included in polymorph. analysis?') includes a 1 to indicate strains that were used in calculations of patterns of polymorphism and a zero for those excluded from that analysis.

| Strain ID | Total reads | Read length | Non-contam. reads | Mapped reads | Mapped reads % | Per base mean coverage (genome) | Per base mean coverage (chrom.) | Included in polymorph. analysis? |
|-----------|-------------|-------------|-------------------|--------------|----------------|---------------------------------|---------------------------------|----------------------------------|
| B10       | 34385014    | 75          | 31432596          | 30871990     | 98.21          | 58.40                           | 52.88                           | 1                                |
| C5A       | 23321484    | 75          | 21031964          | 20324093     | 96.48          | 38.43                           | 31.50                           | 1                                |
| CT10B     | 20763216    | 100         | 16548320          | 16252852     | 98.21          | 40.99                           | 11.32                           | 1                                |
| DCB10B1   | 21411036    | 100         | 14473888          | 13465688     | 93.03          | 34.23                           | 21.94                           | 1                                |
| DD10      | 8924128     | 100         | 8059734           | 7962941      | 98.80          | 22.44                           | 12.01                           | 1                                |
| DD11      | 18066502    | 100         | 15298270          | 14975233     | 97.89          | 42.70                           | 9.18                            | 1                                |
| DD185*    | 32156550    | 100         | 24271648          | 23284644     | 95.93          | 61.80                           | 42.56                           | 1                                |
| DD61      | 12319758    | 100         | 11371264          | 11226723     | 98.73          | 31.72                           | 18.40                           | 1                                |
| FW1H1B    | 20061764    | 100         | 16825222          | 11629871     | 69.12          | 29.60                           | 18.68                           | 1                                |
| GC1A      | 20783966    | 100         | 14904262          | 14097970     | 94.59          | 35.80                           | 16.77                           | 1                                |
| K10*      | 40108102    | 100         | 33116674          | 27045169     | 81.67          | 68.52                           | 37.93                           | 1                                |
| MFD       | 42742286    | 75          | 40131250          | 39400116     | 98.14          | 74.34                           | 65.07                           | 1                                |
| ML        | 9637686     | 100         | 8790188           | 8474660      | 96.41          | 23.76                           | 14.91                           | 1                                |
| NC105.1*  | 17166114    | 100         | 16141950          | 14010535     | 86.80          | 40.40                           | 23.98                           | 1                                |
| NC28.1    | 13217886    | 100         | 11430062          | 7279115      | 63.68          | 18.90                           | 11.42                           | 1                                |
| NC34.1    | 10884346    | 100         | 9735146           | 9243103      | 94.95          | 26.03                           | 14.55                           | 1                                |
| NC34.2    | 11332308    | 100         | 10532664          | 9654075      | 91.66          | 27.18                           | 16.72                           | 1                                |
| NC39.1    | 10590568    | 100         | 9856900           | 9791834      | 99.34          | 27.66                           | 13.95                           | 1                                |
| NC43.1    | 12126882    | 100         | 10684330          | 10491980     | 98.20          | 29.66                           | 15.17                           | 1                                |
| NC47.2    | 19254528    | 100         | 16699050          | 11797028     | 70.64          | 29.55                           | 15.60                           | 1                                |
| NC52.3    | 11223948    | 100         | 10438546          | 8304541      | 79.56          | 23.43                           | 12.13                           | 1                                |
| NC54.2    | 11641348    | 100         | 10706850          | 7102010      | 66.33          | 19.95                           | 11.21                           | 1                                |
| NC58.1    | 11262548    | 100         | 10457086          | 7533934      | 72.05          | 20.95                           | 10.77                           | 1                                |
| NC59.2    | 24165384    | 100         | 19375144          | 15117494     | 78.03          | 38.07                           | 21.62                           | 1                                |
| NC60.1*   | 64204148    | 100/75      | 58140654          | 50994639     | 87.71          | 100.29                          | 85.29                           | 1                                |
| NC60.2    | 11800386    | 100         | 11070524          | 8230005      | 74.34          | 22.56                           | 12.20                           | 1                                |

|         |          |     |          |          |       |       |       |   |
|---------|----------|-----|----------|----------|-------|-------|-------|---|
| NC61.1  | 27936808 | 100 | 22116714 | 16608045 | 75.09 | 40.98 | 30.80 | 1 |
| NC63.2  | 13075110 | 100 | 11763250 | 9255376  | 78.68 | 25.93 | 14.04 | 1 |
| NC66.2  | 17673410 | 100 | 11429722 | 8188917  | 71.65 | 20.89 | 11.59 | 1 |
| NC67.2  | 15551052 | 100 | 14308188 | 14196947 | 99.22 | 40.14 | 21.47 | 1 |
| NC69.1  | 11060934 | 100 | 9973384  | 9795018  | 98.21 | 27.56 | 12.38 | 1 |
| NC70.1  | 23111816 | 100 | 16789088 | 16285599 | 97.00 | 41.58 | 27.19 | 1 |
| NC71.1  | 9390808  | 100 | 8613060  | 8522557  | 98.95 | 24.04 | 12.94 | 1 |
| NC73.1  | 13429248 | 100 | 12609366 | 7674711  | 60.87 | 19.98 | 12.63 | 1 |
| NC75.2  | 10751628 | 100 | 6715160  | 5318106  | 79.20 | 13.40 | 9.26  | 1 |
| NC76.1  | 11718310 | 100 | 10807784 | 9630468  | 89.11 | 26.95 | 15.30 | 1 |
| NC77.1  | 27577534 | 100 | 18574722 | 17687435 | 95.22 | 44.77 | 24.06 | 1 |
| NC78.2  | 11962440 | 100 | 11216942 | 10598239 | 94.48 | 29.87 | 16.28 | 1 |
| NC80.1  | 11290350 | 100 | 10425402 | 9836757  | 94.35 | 27.75 | 16.67 | 1 |
| NC85.2* | 35375420 | 100 | 28070750 | 21157814 | 75.37 | 56.81 | 36.39 | 1 |
| NC87.1  | 9525944  | 100 | 8656322  | 8567125  | 98.97 | 24.19 | 12.99 | 1 |
| NC88.2  | 10576868 | 100 | 9837448  | 9712723  | 98.73 | 27.39 | 14.10 | 1 |
| NC94.1  | 20262894 | 100 | 16165914 | 15710518 | 97.18 | 39.92 | 25.60 | 1 |
| NC96.1  | 11221844 | 100 | 10495372 | 9721503  | 92.63 | 27.45 | 13.86 | 1 |
| NC98.1  | 20486210 | 100 | 16809728 | 15732687 | 93.59 | 40.22 | 22.14 | 1 |
| NC99.1  | 10186228 | 100 | 9348362  | 8316244  | 88.96 | 23.02 | 13.28 | 1 |
| QS102*  | 37899498 | 100 | 27167974 | 25137071 | 92.52 | 66.45 | 34.25 | 1 |
| QS111   | 17479192 | 100 | 15348940 | 11487780 | 74.84 | 31.11 | 12.36 | 1 |
| QS112   | 21527728 | 100 | 12769174 | 8745058  | 68.49 | 24.98 | 4.63  | 1 |
| QS31    | 10476544 | 100 | 9444146  | 7650527  | 81.01 | 21.45 | 12.89 | 1 |
| S109*   | 43936088 | 100 | 27080588 | 19621561 | 72.46 | 51.27 | 18.15 | 1 |
| S210    | 27993674 | 75  | 19145660 | 14858477 | 71.24 | 27.99 | 19.23 | 1 |
| S212    | 29509580 | 100 | 20969382 | 19998803 | 95.37 | 48.35 | 11.65 | 1 |
| S220    | 12037102 | 100 | 10766150 | 10480091 | 97.34 | 29.62 | 15.91 | 1 |
| S224    | 24590136 | 100 | 20886932 | 20409167 | 97.71 | 51.27 | 28.07 | 1 |
| S63     | 22773340 | 100 | 12571660 | 10373749 | 82.52 | 26.22 | 17.44 | 1 |
| SB42A   | 26052828 | 75  | 22570436 | 21740206 | 96.31 | 41.03 | 34.03 | 1 |
| V12     | 26079132 | 75  | 23167030 | 22621241 | 97.61 | 42.78 | 34.01 | 1 |
| WS10    | 17377982 | 100 | 14390562 | 14068133 | 97.76 | 39.95 | 10.97 | 1 |
| WS269   | 30659418 | 75  | 20002946 | 18520159 | 92.08 | 34.93 | 28.96 | 1 |
| WS380B  | 20617846 | 75  | 16973572 | 15375271 | 90.14 | 29.01 | 22.84 | 1 |
| WS51    | 46376390 | 75  | 40429304 | 38927788 | 96.27 | 73.28 | 59.35 | 1 |
| WS576   | 44416436 | 75  | 38170062 | 36656555 | 96.01 | 69.16 | 54.44 | 1 |
| WS582   | 15720948 | 75  | 14782818 | 14467251 | 97.80 | 27.18 | 22.11 | 1 |
| WS583   | 33805698 | 75  | 23190242 | 21675680 | 93.39 | 40.85 | 28.90 | 1 |
| WS655   | 44048228 | 75  | 38063298 | 34875910 | 88.36 | 65.79 | 54.92 | 1 |
| WS656   | 26786176 | 75  | 21880706 | 20908903 | 95.49 | 39.41 | 26.01 | 1 |
| CF3B    | 31266072 | 75  | 27950312 | 21726675 | 75.93 | 38.63 | 36.35 | 0 |
| CR116C  | 16589978 | 100 | 11964168 | 10445830 | 87.31 | 25.92 | 19.81 | 0 |
| KGL29A  | 14915434 | 100 | 7941930  | 5778992  | 72.77 | 13.86 | 12.21 | 0 |
| OT3A    | 10082296 | 100 | 9208118  | 8147544  | 88.48 | 21.75 | 13.36 | 0 |
| QS105   | 21711416 | 100 | 16959584 | 11654253 | 68.72 | 31.34 | 13.03 | 0 |

|        |           |     |          |          |       |       |       |   |
|--------|-----------|-----|----------|----------|-------|-------|-------|---|
| S6B    | 24350904  | 100 | 20829444 | 17766146 | 85.29 | 43.87 | 34.75 | 0 |
| TAB13B | 22494010  | 100 | 14591716 | 10746610 | 73.65 | 27.16 | 14.87 | 0 |
| V34    | 41029130  | 75  | 35847442 | 28754674 | 78.66 | 51.32 | 45.54 | 0 |
| WS205  | 106845752 | 75  | 38732084 | 36773302 | 94.91 | 69.01 | 53.42 | 0 |
| WS2054 | 57867168  | 75  | 50601032 | 49038594 | 96.87 | 91.92 | 78.27 | 0 |
| WS2162 | 39042866  | 75  | 32611428 | 31054375 | 95.21 | 58.51 | 49.99 | 0 |
| WS584  | 32986834  | 75  | 11219322 | 3048226  | 21.23 | 4.98  | 3.08  | 0 |

### Supplementary References

1. Rosengarten, R. D. *et al.* Leaps and lulls in the developmental transcriptome of *Dictyostelium discoideum*. *BMC Genomics* **16**, 294 (2015).
2. Noh, S., Geist, K. S., Tian, X., Strassmann, J. E. & Queller, D. C. Genetic signatures of microbial altruism and cheating in social amoebas in the wild. *Proc. Natl. Acad. Sci.* 201720324 (2018). doi:10.1073/pnas.1720324115
3. Parikh, A. *et al.* Conserved developmental transcriptomes in evolutionarily divergent species. *Genome Biol.* **11**, R35 (2010).
4. Santorelli, L. A. *et al.* Facultative cheater mutants reveal the genetic complexity of cooperation in social amoebae. *Nature* **451**, 1107–1110 (2008).
5. Schilde, C. *et al.* A set of genes conserved in sequence and expression traces back the establishment of multicellularity in social amoebae. *BMC Genomics* **17**, 871 (2016).
